# Supplementary material
Source: Springer Nature journal article supplement (https://www.springermedizin.de/resource/supplementary/12891_2011_1509_MOESM3_ESM.pdf/9507992)

Figure 2.b. The prevalence of long-duration BNP with corresponding 95% confidence intervals among men and women respectively.

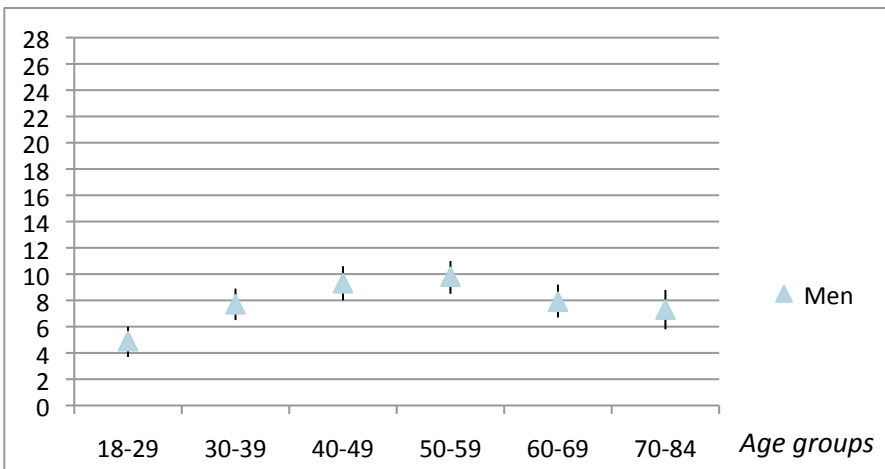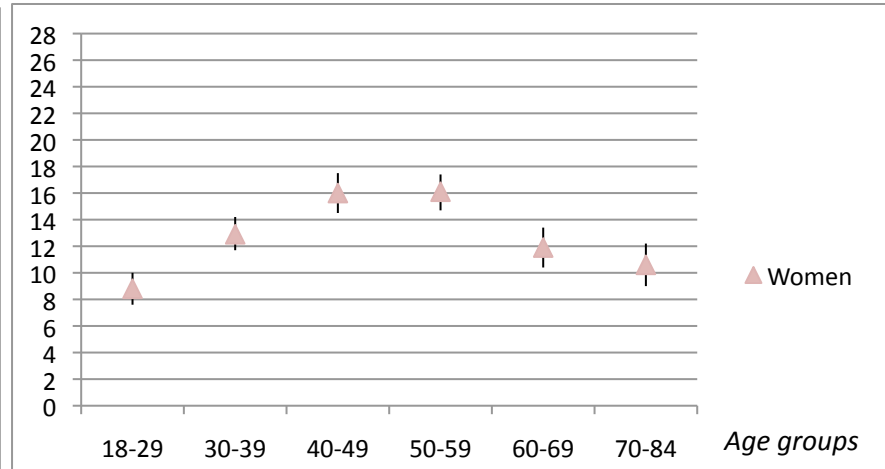

Supplement: MOESM3 [file 9507992]
